# Supplementary material for: A remote sensing algorithm for vertically resolved cloud condensation nuclei number concentrations from airborne and spaceborne lidar observations
Source: Copernicus journal article supplement (doi:10.5194/acp-24-2861-2024), 2024-03-05
Supplement: Supplementary file 1 [file acp-24-2861-2024-supplement.pdf]

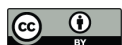

*Supplement of*

## **A remote sensing algorithm for vertically resolved cloud condensation nuclei number concentrations from airborne and spaceborne lidar observations**

**Piyushkumar N. Patel et al.**

*Correspondence to:* Piyushkumar N. Patel ([piyushether@gmail.com](mailto:piyushether@gmail.com), [piyushkumar.n.patel@jpl.nasa.gov](mailto:piyushkumar.n.patel@jpl.nasa.gov))

The copyright of individual parts of the supplement might differ from the article licence.

## Supplementary Information

1  
2  
4  
5  
6  
7  
8  
9

Table S1: Typical range of lidar-derived depolarization ratios of dust and non-dust (pollution and marine) components. These values are compiled from various field campaign, cruise measurements, data from PollyNET/EARLINET stations. In our study, we use the average values of these ranges to distinguish dust and non-dust component within the dust mixture.

| Parameters           | 355 nm      | 532 nm      | 1064 nm     | References                                                                                                                                                                                                                                                                                  |
|----------------------|-------------|-------------|-------------|---------------------------------------------------------------------------------------------------------------------------------------------------------------------------------------------------------------------------------------------------------------------------------------------|
| Dust                 |             |             |             |                                                                                                                                                                                                                                                                                             |
| Depolarization ratio | 0.22 – 0.26 | 0.27 – 0.35 | 0.03 – 0.1  | (Preißler et al., 2011; Groß et al., 2011; Kanitz et al., 2013; Baars et al., 2016; Haarig et al., 2017; Bohlmann et al., 2018; Haarig et al., 2022; Rittmeister et al., 2017; Kaduk, 2017; Szczepanik et al., 2021; Hofer et al., 2020; Müller et al., 2007; Filioglou et al., 2020)       |
| Non-dust             |             |             |             |                                                                                                                                                                                                                                                                                             |
| Depolarization ratio | 0.02 – 0.09 | 0.02 – 0.05 | 0.01 – 0.04 | (Ansmann et al., 2005; Müller et al., 2007; Tesche et al., 2007; Komppula et al., 2012; Preißler et al., 2013; Hänel et al., 2012; Giannakaki et al., 2016; Heese et al., 2017; Kaduk, 2017; Janicka et al., 2016; Rittmeister et al., 2017; Gasteiger et al., 2011; Bohlmann et al., 2018) |

10  
11

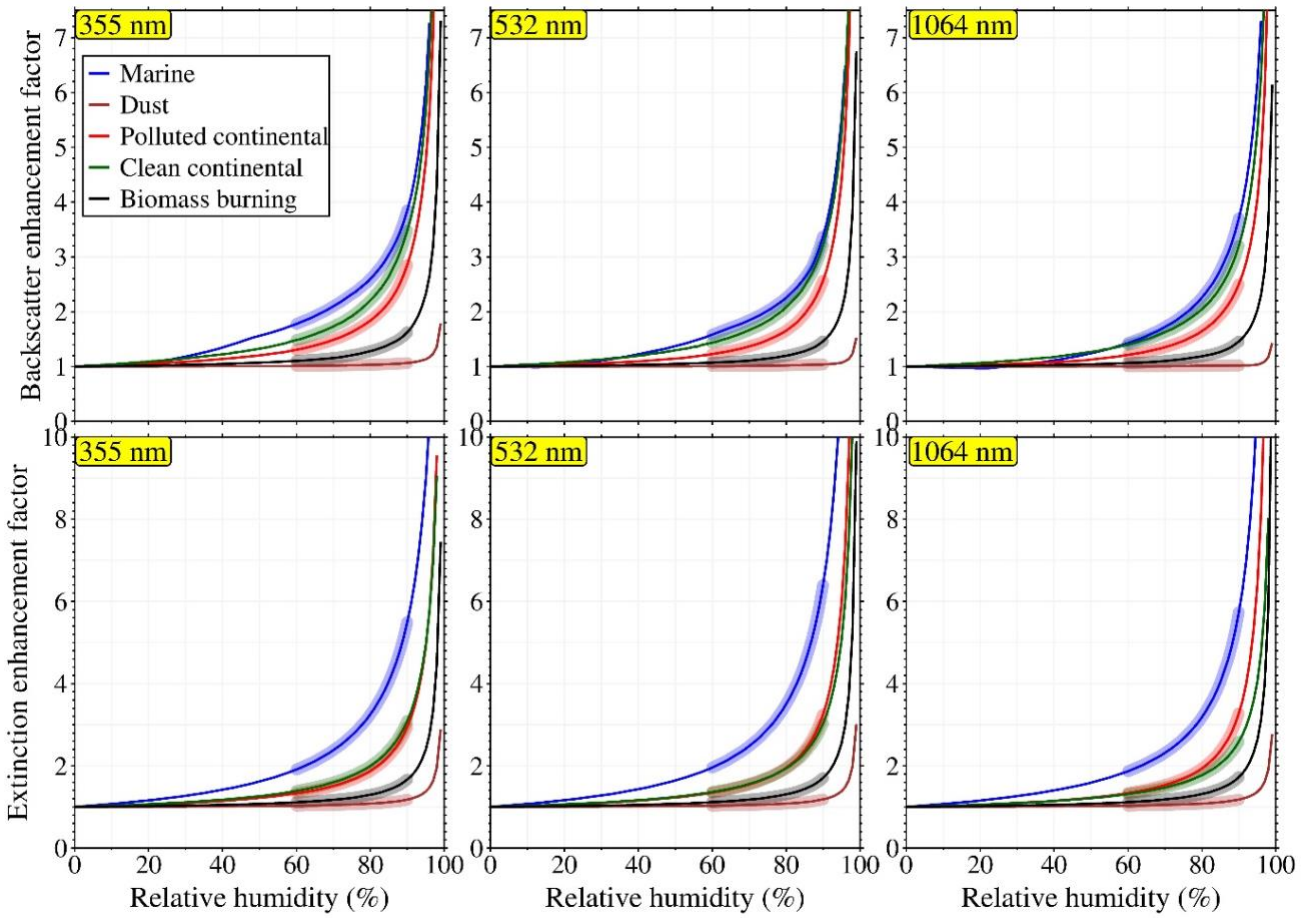

12  
13

14 Figure S1: Mean enhancement factor for backscatter and extinction coefficients at 355, 532 and  
15 1064 nm are fitted using Eq (6) for five aerosol subtypes. This mean fitting curve is calculated  
16 with the set of PNSD and  $\kappa$  considered for the construction of LUTs. The thin line represents Mie  
17 model simulations, and the highlighted thick line (within RH range of 60-90%) are used to fit  
18 parameterization lines.

19

20

21

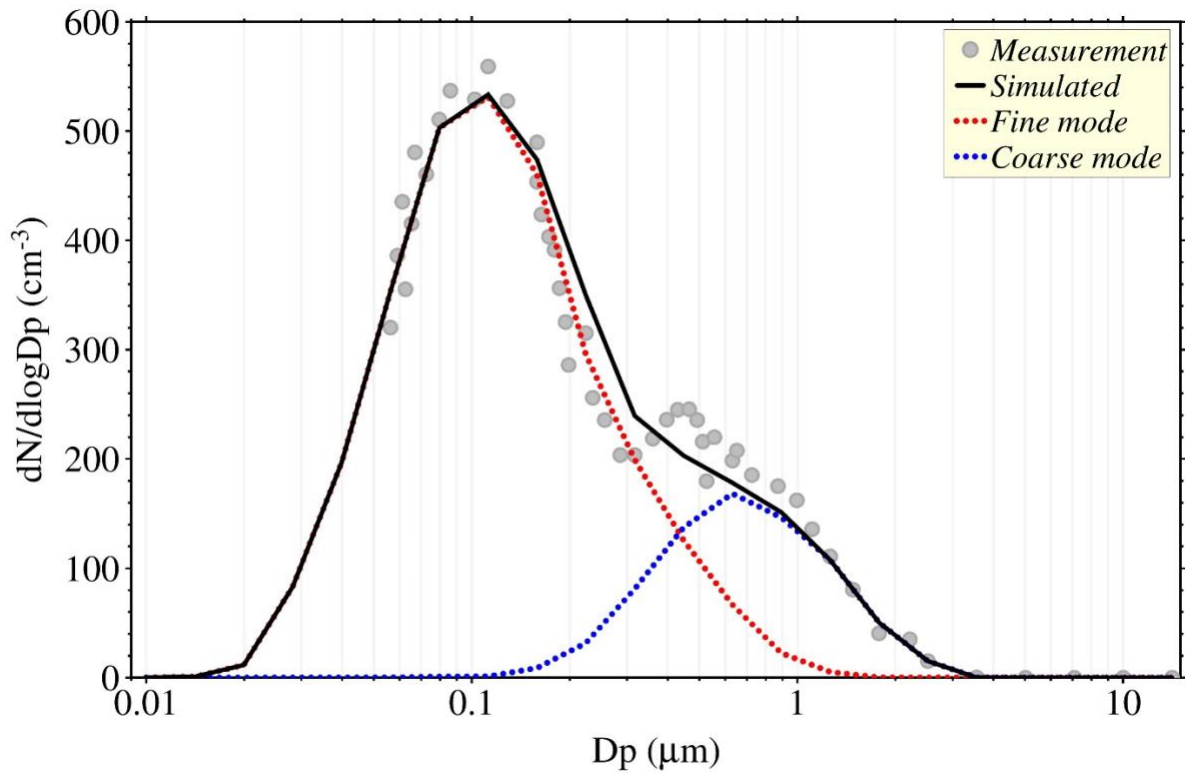

22

23 Figure S2: Observed aerosol particle size distribution during the NASA Oracles mission. Particle  
24 size is represented by the geometric diameter. Solid dots denote integrated Ultra-High Sensitivity  
25 Aerosol Spectrometer (UHSAS) and Aerodynamic Particle Sizer (APS) measurements. Curves are  
26 bimodal lognormal fits for the size distributions of the fine mode (red dotted line), the coarse mode  
27 (blue dotted line), and the full mode (black solid line).

28

29  
30  
31

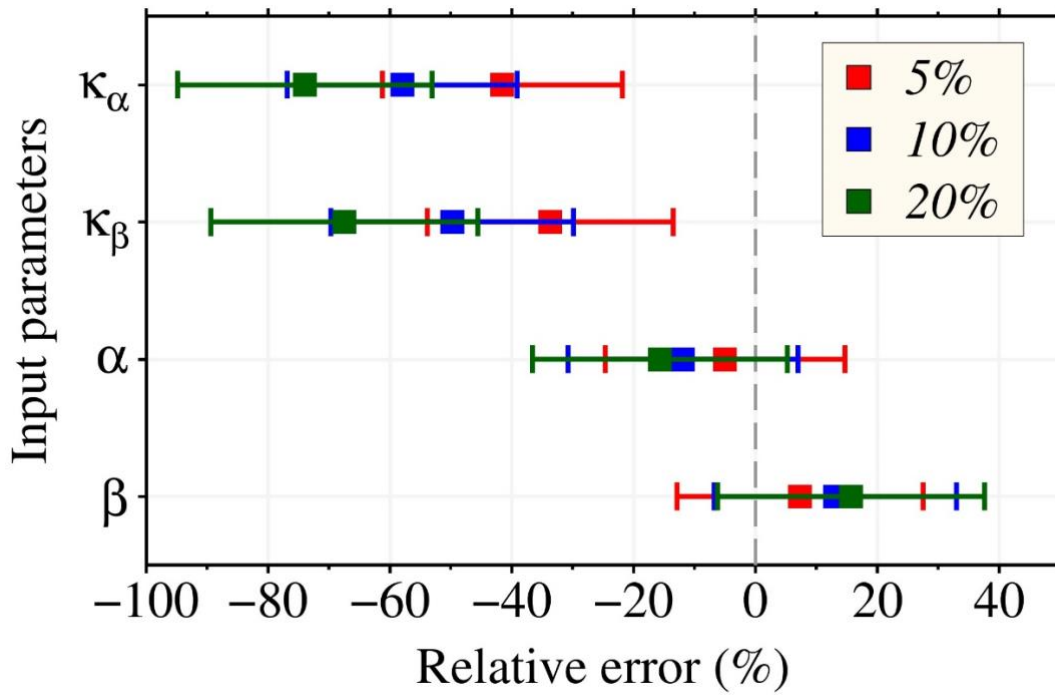

32  
33 Figure S3: Relative errors in input parameters (backscattering coefficient, extinction coefficient,  
34 enhancement factor of backscatter coefficients and enhancement factor of extinction coefficients)  
35 with 5%, 10% and 20% of random error in relative humidity (RH). The dots are the median values  
36 and the error bars denote the 5<sup>th</sup> and 95<sup>th</sup> percentile.

37

38  
39

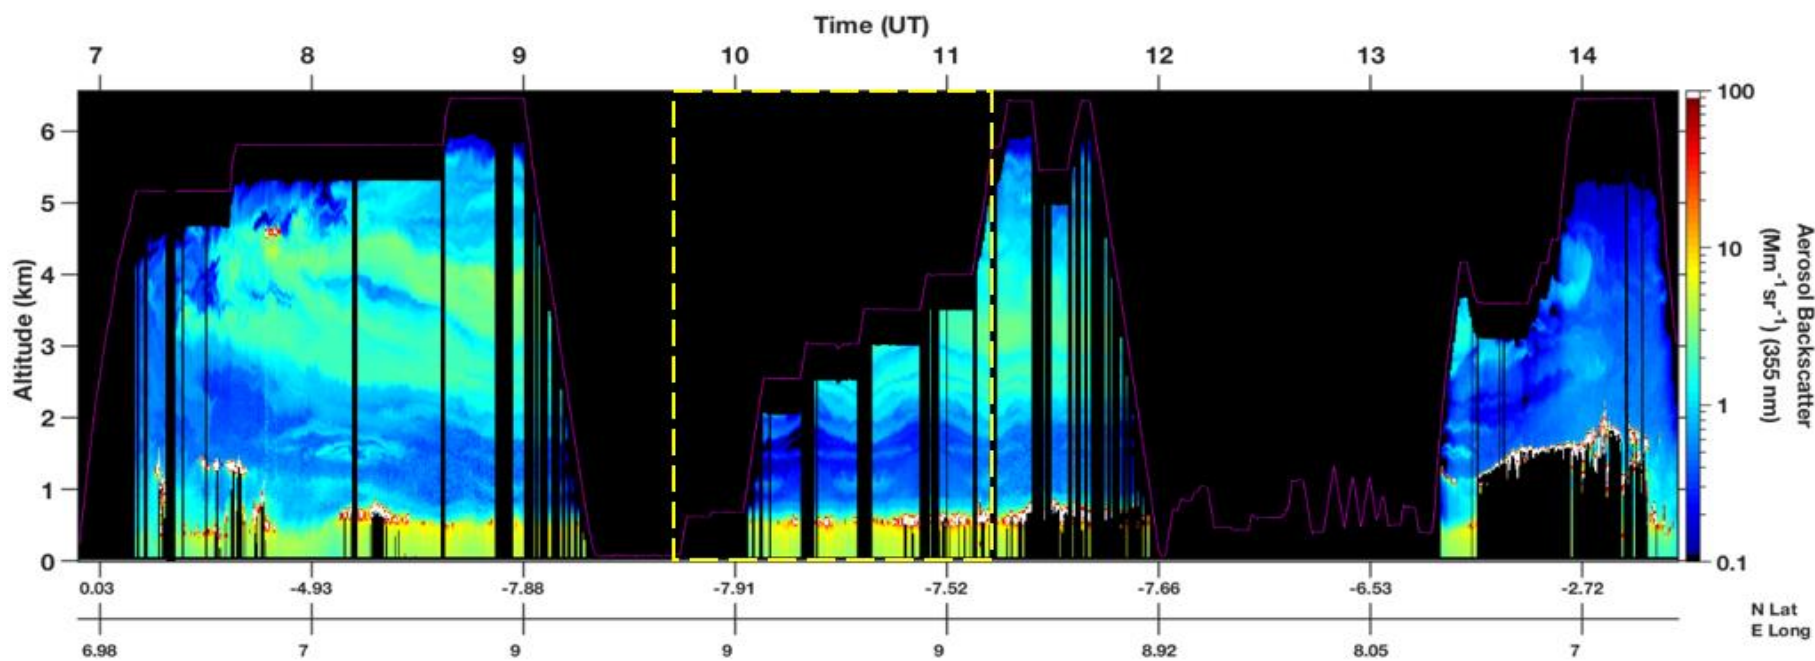

40

41 Figure S4: The HSRL-2 derived aerosol backscatter at 355 nm from the flight of NASA ORACLES campaign on 19 October 2018. The  
42 pink line displays the flight trajectory, whereas the yellow dotted line box illustrates the region of interest with the ascending of flight  
43 were used for the profile-based validation of ECLiAP retrieved NCCN from HSRL-2 measurements against the measured NCCN from  
44 CCN counter.

45

46  
47  
48

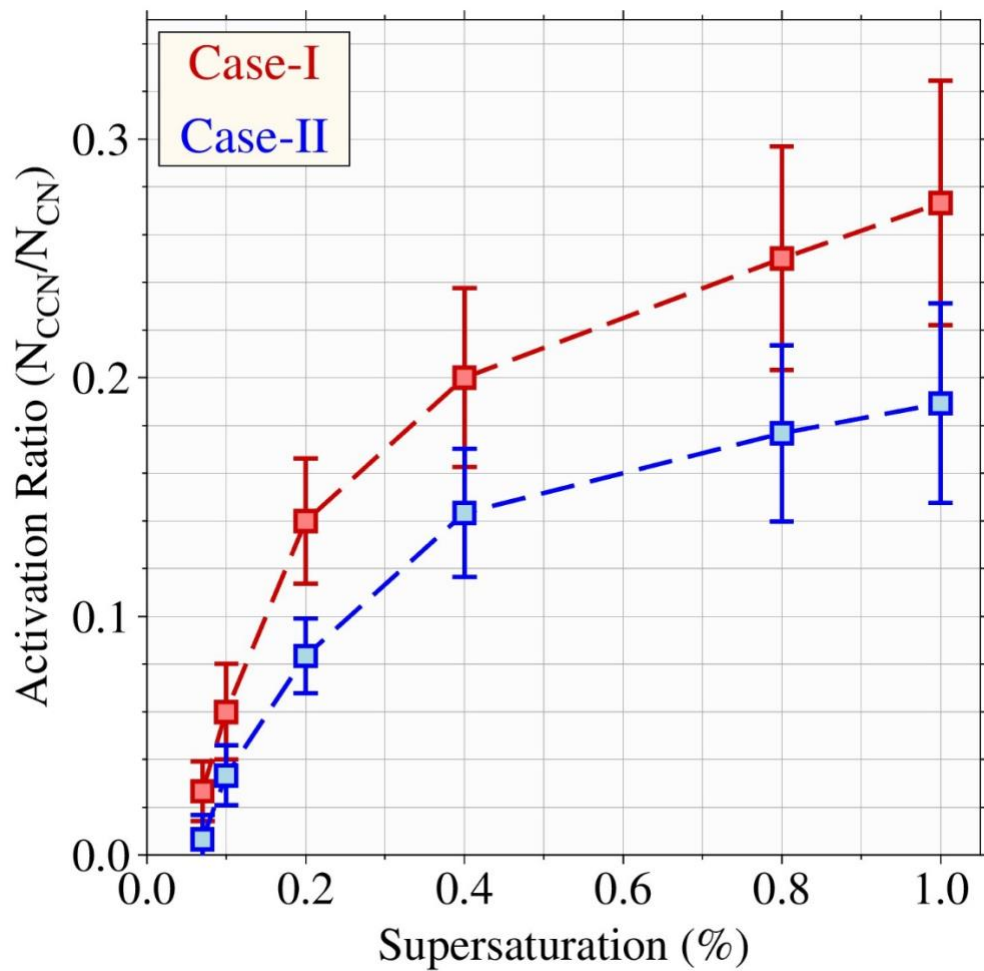

49  
50 Figure S5: The mean activation ratio spectra as a function of supersaturation for the case-I and  
51 case-II identified from the CALIOP observations on 01 January 2019.

52

- 53 Ansmann, A., Engelmann, R., Althausen, D., Wandinger, U., Hu, M., Zhang, Y., and He, Q.: High  
54 aerosol load over the Pearl River Delta, China, observed with Raman lidar and Sun photometer,  
55 *Geophys. Res. Lett.*, 32, 1–4, <https://doi.org/10.1029/2005GL023094>, 2005.
- 56 Baars, H., Kanitz, T., Engelmann, R., Althausen, D., Heese, B., Komppula, M., Preißler, J.,  
57 Tesche, M., Ansmann, A., Wandinger, U., Lim, J. H., Young Ahn, J., Stachlewska, I. S.,  
58 Amiridis, V., Marinou, E., Seifert, P., Hofer, J., Skupin, A., Schneider, F., Bohlmann, S., Foth,  
59 A., Bley, S., Pfüller, A., Giannakaki, E., Lihavainen, H., Viisanen, Y., Kumar Hooda, R.,  
60 Pereira, S. N., Bortoli, D., Wagner, F., Mattis, I., Janicka, L., Markowicz, K. M., Achtert, P.,  
61 Artaxo, P., Pauliquevis, T., Souza, R. A. F., Prakesh Sharma, V., Gideon Van Zyl, P., Paul  
62 Beukes, J., Sun, J., Rohwer, E. G., Deng, R., Mamouri, R. E., and Zamorano, F.: An overview  
63 of the first decade of PollyNET: An emerging network of automated Raman-polarization lidars  
64 for continuous aerosol profiling, *Atmos. Chem. Phys.*, 16, 5111–5137,  
65 <https://doi.org/10.5194/ACP-16-5111-2016>, 2016.
- 66 Bohlmann, S., Baars, H., Radenz, M., Engelmann, R., and Macke, A.: Ship-borne aerosol profiling  
67 with lidar over the Atlantic Ocean: From pure marine conditions to complex dust-smoke  
68 mixtures, *Atmos. Chem. Phys.*, 18, 9661–9679, <https://doi.org/10.5194/ACP-18-9661-2018>,  
69 2018.
- 70 Filioglou, M., Giannakaki, E., Backman, J., Kesti, J., Hirsikko, A., Engelmann, R., O’Connor, E.,  
71 Leskinen, J. T. T., Shang, X., Korhonen, H., Lihavainen, H., Romakkaniemi, S., and Komppula,  
72 M.: Optical and geometrical aerosol particle properties over the United Arab Emirates, *Atmos.*  
73 *Chem. Phys.*, 20, 8909–8922, <https://doi.org/10.5194/ACP-20-8909-2020>, 2020.
- 74 Gasteiger, J., Groß, S., Freudenthaler, V., and Wiegner, M.: Volcanic ash from Iceland over  
75 Munich: Mass concentration retrieved from ground-based remote sensing measurements,  
76 *Atmos. Chem. Phys.*, 11, 2209–2223, <https://doi.org/10.5194/ACP-11-2209-2011>, 2011.
- 77 Giannakaki, E., Van Zyl, P. G., Müller, D., Balis, D., and Komppula, M.: Optical and  
78 microphysical characterization of aerosol layers over South Africa by means of multi-  
79 wavelength depolarization and Raman lidar measurements, *Atmos. Chem. Phys.*, 16, 8109–  
80 8123, <https://doi.org/10.5194/ACP-16-8109-2016>, 2016.
- 81 Groß, S., Tesche, M., Freudenthaler, V., Toledano, C., Wiegner, M., Ansmann, A., Althausen, D.,  
82 and Seefeldner, M.: Characterization of Saharan dust, marine aerosols and mixtures of biomass-  
83 burning aerosols and dust by means of multi-wavelength depolarization and Raman lidar  
84 measurements during SAMUM 2, *Tellus B Chem Phys Meteorol*, 63, 706–724,  
85 <https://doi.org/10.1111/J.1600-0889.2011.00556.X>, 2011.
- 86 Haarig, M., Ansmann, A., Althausen, D., Klepel, A., Groß, S., Freudenthaler, V., Toledano, C.,  
87 Mamouri, R. E., Farrell, D. A., Prescod, D. A., Marinou, E., Burton, S. P., Gasteiger, J.,  
88 Engelmann, R., and Baars, H.: Triple-wavelength depolarization-ratio profiling of Saharan dust  
89 over Barbados during SALTRACE in 2013 and 2014, *Atmos. Chem. Phys.*, 17, 10767–10794,  
90 <https://doi.org/10.5194/ACP-17-10767-2017>, 2017.
- 91 Haarig, M., Ansmann, A., Engelmann, R., Baars, H., Toledano, C., Torres, B., Althausen, D.,  
92 Radenz, M., and Wandinger, U.: First triple-wavelength lidar observations of depolarization  
93 and extinction-to-backscatter ratios of Saharan dust, *Atmos. Chem. Phys.*, 22, 355–369,  
94 <https://doi.org/10.5194/ACP-22-355-2022>, 2022.



- 95 Hänel, A., Baars, H., Althausen, D., Ansmann, A., Engelmann, R., and Sun, J. Y.: One-year aerosol  
96 profiling with EUCAARI Raman lidar at Shangdianzi GAW station: Beijing plume and  
97 seasonal variations, *J. Geophys. Res. Atmos.*, 117, <https://doi.org/10.1029/2012JD017577>,  
98 2012.
- 99 Heese, B., Baars, H., Bohlmann, S., Althausen, D., and Deng, R.: Continuous vertical aerosol  
100 profiling with a multi-wavelength Raman polarization lidar over the Pearl River Delta, China,  
101 *Atmos. Chem. Phys.*, 17, 6679–6691, <https://doi.org/10.5194/ACP-17-6679-2017>, 2017.
- 102 Hofer, J., Ansmann, A., Althausen, D., Engelmann, R., Baars, H., Wadinga Fomba, K.,  
103 Wandinger, U., Abdullaev, S. F., and Makhmudov, A. N.: Optical properties of Central Asian  
104 aerosol relevant for spaceborne lidar applications and aerosol typing at 355 and 532nm, *Atmos.*  
105 *Chem. Phys.*, 20, 9265–9280, <https://doi.org/10.5194/ACP-20-9265-2020>, 2020.
- 106 Janicka, L., Stachlewska, I. S., Markowicz, K. M., Baars, H., Engelmann, R., and Heese, B.: Lidar  
107 Measurements of Canadian Forest Fire Smoke Episode Observed in July 2013 over Warsaw,  
108 Poland, *EPJ Web Conf*, 119, <https://doi.org/10.1051/EPJCONF/201611918005>, 2016.
- 109 Kaduk, C.: Characterization of the optical properties of complex aerosol mixtures observed with a  
110 multiwavelength–Raman– polarization lidar during the 6-weeks BACCHUS campaign in  
111 Cyprus in spring 2015, Leipzig University, 2017.
- 112 Kanitz, T., Ansmann, A., Engelmann, R., and Althausen, D.: North-south cross sections of the  
113 vertical aerosol distribution over the Atlantic Ocean from multiwavelength Raman/polarization  
114 lidar during Polarstern cruises, *J. Geophys. Res. Atmos.*, 118, 2643–2655,  
115 <https://doi.org/10.1002/JGRD.50273>, 2013.
- 116 Komppula, M., Mielonen, T., Arola, A., Korhonen, K., Lihavainen, H., Hyvärinen, A. P., Baars,  
117 H., Engelmann, R., Althausen, D., Ansmann, A., Müller, D., Panwar, T. S., Hooda, R. K.,  
118 Sharma, V. P., Kerminen, V. M., Lehtinen, K. E. J., and Viisanen, Y.: Technical Note: One  
119 year of Raman-lidar measurements in Gual Pahari EUCAARI site close to New Delhi in India-  
120 Seasonal characteristics of the aerosol vertical structure, *Atmos. Chem. Phys.*, 12, 4513–4524,  
121 <https://doi.org/10.5194/ACP-12-4513-2012>, 2012.
- 122 Müller, D., Ansmann, A., Mattis, I., Tesche, M., Wandinger, U., Althausen, D., and Pisani, G.:  
123 Aerosol-type-dependent lidar ratios observed with Raman lidar, *J. Geophys. Res. Atmos.*, 112,  
124 <https://doi.org/10.1029/2006JD008292>, 2007.
- 125 Preißler, J., Wagner, F., Pereira, S. N., and Guerrero-Rascado, J. L.: Multi-instrumental  
126 observation of an exceptionally strong Saharan dust outbreak over Portugal, *J. Geophys. Res.*  
127 *Atmos.*, 116, <https://doi.org/10.1029/2011JD016527>, 2011.
- 128 Preißler, J., Wagner, F., Guerrero-Rascado, J. L., and Silva, A. M.: Two years of free-tropospheric  
129 aerosol layers observed over Portugal by lidar, *J. Geophys. Res. Atmos.*, 118, 3676–3686,  
130 <https://doi.org/10.1002/JGRD.50350>, 2013.
- 131 Rittmeister, F., Ansmann, A., Engelmann, R., Skupin, A., Baars, H., Kanitz, T., and Kinne, S.:  
132 Profiling of Saharan dust from the Caribbean to western Africa-Part 1: Layering structures and  
133 optical properties from shipborne polarization/Raman lidar observations, *Atmos. Chem. Phys.*,  
134 17, 12963–12983, <https://doi.org/10.5194/ACP-17-12963-2017>, 2017.

- 135 Szczepanik, D. M., Stachlewska, I. S., Tetoni, E., and Althausen, D.: Properties of Saharan Dust  
136 Versus Local Urban Dust—A Case Study, *Earth Space Sci.*, 8,  
137 <https://doi.org/10.1029/2021EA001816>, 2021.
- 138 Tesche, M., Ansmann, A., Müller, D., Althausen, D., Engelmann, R., Hu, M., and Zhang, Y.:  
139 Particle backscatter, extinction, and lidar ratio profiling with Raman lidar in south and north  
140 China, *Appl. Opt.*, 46, 6302–6308, <https://doi.org/10.1364/AO.46.006302>, 2007.
- 141
